# Supplementary material
Source: PubMed Central journal article supplement (PMC4012579)
Supplement: supp_pp.113.233775_233775supp.pdf [file supp_pp.113.233775_233775supp.pdf]

**Table S1:** Primer list.

|                               |                                                          |                                   |
|-------------------------------|----------------------------------------------------------|-----------------------------------|
| qRT-GL2 F                     | ATGAAGCTCGTCGGCATGAGTGGG                                 | Morohashi et al.,<br>2007         |
| qRT-GL2 R                     | TGGATTGCCACTGAGTTGCCTCTG                                 | Morohashi et al.,<br>2007         |
| qRT-TTG1 F                    | GTCTTCTTCGCAGCCTGATT                                     | Kleindt et al.,<br>2010           |
| qRT-TTG1 R                    | AAACCAGCATGAAGTTTCCAA                                    | Kleindt et al.,<br>2010           |
| qRT-WER F                     | CTAATGTGAAAAGAGGCAATTTCA                                 | This study                        |
| qRT-WER R                     | CCCGGCACTCTTTTAGCA                                       | This study                        |
| qRT-TRY F                     | GTGAGCAGTATCGAATGGGAGT                                   | Morohashi et al.,<br>2007         |
| qRT-TRY R                     | CACCGACAAGTCTGTACATTCG                                   | Morohashi et al.,<br>2007         |
| qRT-RSL4-F                    | GTGCCAAACGGGACAAAAGT                                     | Yi et al., 2010                   |
| qRT-RSL4R                     | TTGTGATGGAACCCCATGTC                                     | Yi et al., 2010                   |
| qRT-WRKY75 F                  | CGTCAAGAACAACAAGTTCCCTA                                  | This study                        |
| qRT-WRKY75 R                  | CTTTGCACTTGCTTCTTCACAT                                   | This study                        |
| qRT-EF1 $\alpha$ F            | TGAGCACGCTCTTCTTGCTTTCA                                  | Yi et al., 2010                   |
| qRT-EF1 $\alpha$ R            | GGTGGTGGCATCCATCTTGTTACA                                 | Yi et al., 2010                   |
| AtTSP(Spm32)                  | TACGAATAAGAGCGTCCATTTTAGAGTGA                            | Encinas-Villarejo<br>et al., 2009 |
| AtWRKY-F                      | TTATAATTTGGATTCGGGAACA                                   | Encinas-Villarejo<br>et al., 2009 |
| WRKY75 RNAi PF                | GGACTAGTCCATGGCCAGAGCTGCATCAAGG                          | Devaiah et al.,<br>2007           |
| WRKY75 RNAi PR                | CGGGATCCGGCGGCCATCCTCCATATGTACC                          | Devaiah et al.,<br>2007           |
| AtWRKY-R                      | GACGGTGCTGAAGAACAATG                                     | Encinas-Villarejo<br>et al., 2009 |
| WRKY75-for-attB1              | GGGGACAAGTTTGTACAAAAAAGCAGGCTTA<br>ATGGAGGGATATGATAATGGG | This study                        |
| WRKY75-rev-Stop/ost-<br>attB2 | GGGGACCACTTTGTACAAGAAAGCTGGGTAC<br>WAGAAAGAAGAGTAGATTTGC | This study                        |
| 80bp CPC-Promotor-<br>Trimer  | AGAATTCAAAGGATCCGATCTCGGTGACGGG                          | This study                        |
| 80bp CPC-Promotor-<br>Trimer  | AGGTACCATAGAGAAAGAAGAACGACAGAT<br>ACAACC                 | This study                        |
| 80bp CPC-Promotor-            | AGGTACAAAGGATCCGATCT CGGTG ACGGG                         | This study                        |

|                                  |                                                                                                    |                                   |
|----------------------------------|----------------------------------------------------------------------------------------------------|-----------------------------------|
| Trimer                           |                                                                                                    |                                   |
| 80bp CPC-Promotor-<br>Trimer     | AGGATCCATAGAGAAAGAAGAACGA CAGAT<br>ACAACC                                                          | This study                        |
| 80bp CPC-Promotor-<br>Trimer     | AGGATCCAAAGGATCCGATCTCGGTG ACGGG                                                                   | This study                        |
| 80bp CPC-Promotor-<br>Trimer     | ATCTAGAGATAGAGAAAGAAGAACG ACA<br>GATACAACC                                                         | This study                        |
| Pr185-mutWRKY<br>EcoRI-KpnI for  | aattcAACGAGGAATTTTTACAACCGCAAcccgA<br>GGATTTAAAATAAGTAGTTATGGTTGTATCTG<br>TCGTTCTTCTTTCTCTATggtac  | This study                        |
| Pr185-mutWRKY<br>EcoRI-KpnI rev  | cATAGAGAAAGAAGAACGACAGATACAACC<br>ATAACTACTTATTTTAAATCCTccgggTTGCGG<br>TTGTAAAAATTCCTCGTTg         | This study                        |
| Pr185-mutWRKY KpnI-<br>BamHI for | cAACGAGGAATTTTTACAACCGCAAcccgAG<br>GATTTAAAATAAGTAGTTATGGTTGTATCTG<br>TCGTTCTTCTTTCTCTATg          | This study                        |
| Pr185-mutWRKY KpnI-<br>BamHI rev | gatccATAGAGAAAGAAGAACGACAGATACAA<br>CCATAACTACTTATTTTAAATCCTccgggTTGC<br>GGTTGTAAAAATTCCTCGTTggtac | This study                        |
| Pr185-mutWRKY<br>BamHI-XbaI for  | gatccAACGAGGAATTTTTACAACCGCAAcccg<br>AGGATTTAAAATAAGTAGTTATGGTTGTATC<br>TGTCGTTCTTCTTTCTCTATt      | This study                        |
| Pr185-mutWRKY<br>BamHI-XbaI rev  | ctagaATAGAGAAAGAAGAACGACAGATACAA<br>CCATAACTACTTATTTTAAATCCTccgggTTGC<br>GGTTGTAAAAATTCCTCGTTg     | This study                        |
| AtTSP(Spm32)                     | TACGAATAAGAGCGTCCATTTTAGAGTGA                                                                      | Encinas-Villarejo<br>et al., 2009 |
| GW-WRKY75-CDS F                  | GGGGACAAGTTTGTACAAAAAAGCAGGCTT<br>CATGGAGGGATATGATAATGGG                                           | This study                        |
| GW-WRKY75-CDS R                  | GGGGACCACTTTGTACAAGAAAGCTGGGTC<br>CTTCCTAGAAAGAAGATAGATTT                                          | This study                        |
| EF $\alpha$ F                    | ATGCCCCAGGACATCGTGATTTTCAT                                                                         | (Kirik et al.,<br>2007)           |
| EF $\alpha$ R                    | TTGGCGGCACCCTTAGCTGGATCA                                                                           | (Kirik et al.,<br>2007)           |
| Asc1-pWRKY75 F                   | GGCGCGCCATTAGTAATAGTTACGTTGTAAC<br>TGC                                                             | This study                        |
| Xho1-pWRKY75 R                   | CTCGAGATTCCTAATTATTTGTGGAATC                                                                       | This study                        |
| Asc1-pSCR F                      | GGCGCGCCAGATTGTGATCCTCTGCAAC                                                                       | This study                        |
| Xho1-pSCR R                      | CTCGAGGGAGATTGAAGGGTTGTTGG                                                                         | This study                        |

|            |                                 |            |
|------------|---------------------------------|------------|
| 3'WRKY75 F | CTCGAGTTAATTCTCTCAAATCTTTTATACC | This study |
| 3'WRKY75 R | GGATCAAAGATTCAGGCTCAATTAC       | This study |

**Table S2:** Real time PCR results

| Gene        | Line               | Average $\pm$ Standard deviation | p-value |
|-------------|--------------------|----------------------------------|---------|
| <i>GL2</i>  | <i>wrky75-25</i>   | 0.54 $\pm$ 0.20                  | 4.6E-05 |
|             | <i>WRKY75 RNAi</i> | 0.51 $\pm$ 0.19                  | 1.5E-05 |
|             | <i>p35S:WRKY75</i> | 1.35 $\pm$ 0.30                  | 3.2E-03 |
| <i>TTG1</i> | <i>wrky75-25</i>   | 1.73 $\pm$ 1.21                  | 1.1E-01 |
|             | <i>WRKY75 RNAi</i> | 0.93 $\pm$ 0.44                  | 6.1E-01 |
|             | <i>p35S:WRKY75</i> | 1.83 $\pm$ 1.10                  | 5.3E-02 |
| <i>WER</i>  | <i>wrky75-25</i>   | 0.93 $\pm$ 0.42                  | 7.3E-01 |
|             | <i>WRKY75 RNAi</i> | 0.79 $\pm$ 0.32                  | 2.2E-01 |
|             | <i>p35S:WRKY75</i> | 1.06 $\pm$ 0.35                  | 7.3E-01 |
| <i>CPC</i>  | <i>wrky75-25</i>   | 2.70 $\pm$ 0.27                  | 2.2E-10 |
|             | <i>WRKY75 RNAi</i> | 1.34 $\pm$ 0.18                  | 7.2E-05 |
|             | <i>p35S:WRKY75</i> | 0.70 $\pm$ 0.17                  | 1.2E-04 |
| <i>TRY</i>  | <i>wrky75-25</i>   | 1.72 $\pm$ 0.33                  | 3.0E-03 |
|             | <i>WRKY75 RNAi</i> | 1.31 $\pm$ 0.17                  | 6.7E-03 |
|             | <i>p35S:WRKY75</i> | 0.44 $\pm$ 0.06                  | 2.4E-06 |
| <i>RSL4</i> | <i>wrky75-25</i>   | 2.19 $\pm$ 0.72                  | 2.6E-04 |
|             | <i>WRKY75 RNAi</i> | 1.36 $\pm$ 0.15                  | 3.6E-05 |
|             | <i>p35S:WRKY75</i> | 0.62 $\pm$ 0.27                  | 4.8E-04 |

**Table S3:** Summary of root hair phenotype of *wrky75-25* T1 plants transformed with p*WRKY75::YFP-WRKY75* 3'-*WRKY75*

| <b>Root hair phenotype</b> | <b>Number of plants</b> |
|----------------------------|-------------------------|
| no ectopic root hairs      | 4                       |
| few ectopic root hairs     | 6                       |
| <i>wrky75-25</i> phenotype | 2                       |
| total                      | 12                      |

**Table S4.** Root hair numbers in the patterning zone of the primary roots. Seven-day old *A. thaliana* plants were analysed for each treatment

|                          | T1 <i>pWRKY75:YFP-WRKY75:-WRKY75</i><br>in <i>Col-0</i> background |                                                 | T2 <i>pWRKY75:YFP-WRKY75:3'-WRKY75</i> in <i>wrky75-26</i> background |                                                 |
|--------------------------|--------------------------------------------------------------------|-------------------------------------------------|-----------------------------------------------------------------------|-------------------------------------------------|
| <b>Analyzed seedling</b> | <b>Root hairs in root hair position (%)</b>                        | <b>Root hairs in non-root hair position (%)</b> | <b>Root hairs in root hair position (%)</b>                           | <b>Root hairs in non-root hair position (%)</b> |
| Seedling 1               | 100                                                                | 0                                               | 100                                                                   | 0                                               |
| Seedling 2               | 100                                                                | 0                                               | 100                                                                   | 0                                               |
| Seedling 3               | 100                                                                | 0                                               | 100                                                                   | 0                                               |
| Seedling 4               | 100                                                                | 0                                               | 100                                                                   | 20                                              |
| Seedling 5               | 100                                                                | 0                                               | 100                                                                   | 0                                               |
| Seedling 6               | 100                                                                | 0                                               | 100                                                                   | 0                                               |
| Seedling 7               | 80                                                                 | 0                                               | 100                                                                   | 0                                               |
| Seedling 8               | 90                                                                 | 0                                               | 100                                                                   | 0                                               |
| Seedling 9               | 100                                                                | 0                                               | 100                                                                   | 10                                              |
| Seedling 10              | 90                                                                 | 0                                               | 100                                                                   | 20                                              |
| Seedling 11              | 100                                                                | 0                                               | NA                                                                    | NA                                              |
| Average                  | 96.3                                                               | 0                                               | 10                                                                    | 5                                               |
| Standard deviation       | 6.74                                                               | 0                                               | 0                                                                     | 8.49                                            |

**Table S5:** Summary of root hair phenotype of *wrky75-25* T1 plants transformed with p*SCR:YFP-WRKY75*

| <b>Root hair phenotype</b> | <b>Number of plants</b> |
|----------------------------|-------------------------|
| no ectopic root hairs      | 9                       |
| few ectopic root hairs     | 5                       |
| <i>wrky75-25</i> phenotype | 3                       |
| total                      | 17                      |

Fig. S1

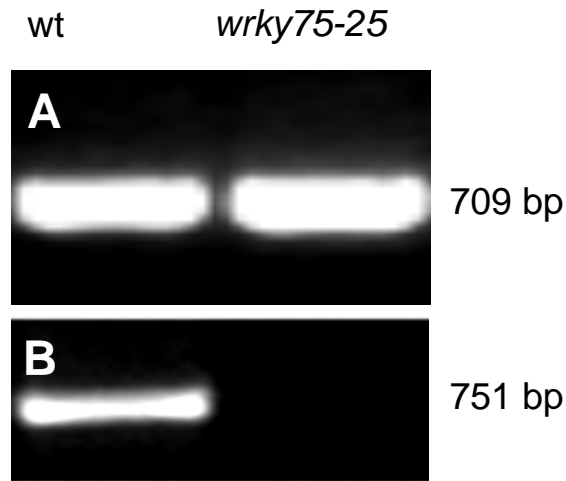

**Figure S1: Agarose gel electrophoresis showing RT-PCR for the *wrky75-25* mutant.** RNA was extracted from plants growing on MS media. (a) PCR product of the *GTP BINDING ELONGATION FACTOR* (*EFα1*) cDNA. (b) PCR product of the *WRKY75* cDNA. Primers used to amplify the fragments were GW-WRKY75-CDS F and GW-WRKY75-CDS R for *WRKY75* cDNA, *EFα* F and *EFα* R for *EFα1*.



Fig. S2

5 'acagttattgcatatagagaagtgaagtgtttgaaatataactaatggtttatatataaatgtgcagGA  
GTTACTATAGGTGTACATATGGAGGATGCAATGTGAAGAAGCAAGT  
GCAAAGATTAACAGTGGACCAAGAAGTGGTCGTGACAACCTACGA  
AGGAGTGCATTCGCATCCCATCGAGAAATCCACCGAAAACCTCGA  
GCATATTCTCACTCAAATGCAAATCTACTCTTCTTTCTAGttaattctctcaa  
aatctttataccttattttagagcctataattcttagagctcatgttgtaaattattacaaaaattagaatggtacatt  
tacgtgtgtgaaaagaaaaacctgcatgatctgatgatcagctgaaATATCGGAAGGCTCGA  
GTTTTTCAGCAGATTACGAATAATAGCGACCATTTTAGAGTGACGGC  
TAAGAGTGTCTGTCAACCGACACTCTTATACTTATAGTGTCCGCTTA  
TTTCATTA AAAATGTGGGAGTTTTGGCCACACTCCTTGCCTTTTTT  
CTTGATT.....  
gtttgtatcctaataattttaataaaaaattcaaaaattgagtgtagtctattactgatagcagcatataatgcacata  
ttaaatttcaacaactgttgctaaacatattattacggttatctgataaatagtaactaatggttaggcgtaata  
agatatgtcatagtcttaactaccaccgaaagttgaagaaaactacatgaggtatgggaatctgaaagttag  
ctagtaagtgacaagaaagtaaaaaatatcaacggagaaaatgactttacaattcttaaaattaa 3 '

**Figure S2: Nucleotide sequence showing the position of *T-DNA* insertion in *wrky75-25* mutant.** The *T-DNA* is inserted 143bp downstream of the stop codon. Dots indicate that the sequence of the *spm* element is not fully sequenced. The primers used: AtTSP(Spm32) and 3'WRKY75 R. Exon=black, intron: pink, STOP codon: blue, green SPM element, "....." not sequenced SPM, red 3'UTR.

Fig. S3

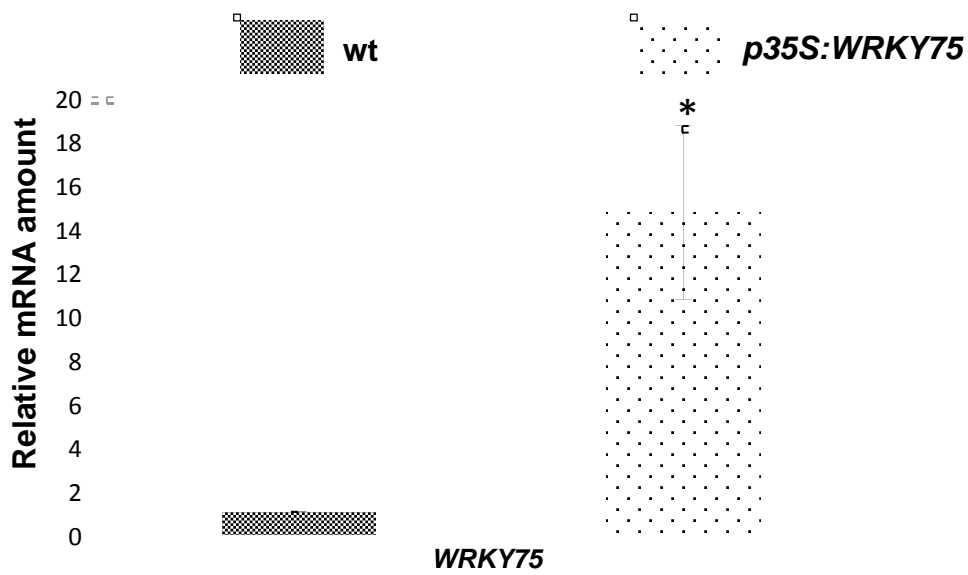

**Figure S3: qRT-PCR of mRNA obtained from root hair-patterning zone of 7-day old seedlings grown on MS media.** The expression levels of genes of wt plants was set to one and subsequently used to calculate the relative changes of *WRKY75* expression of  $P_{35S}:WRKY75$  plants. Error bars indicate the standard deviation of three different biological replicates. \* indicates statistical significance: P value <0.005 (T-test).

Fig. S4

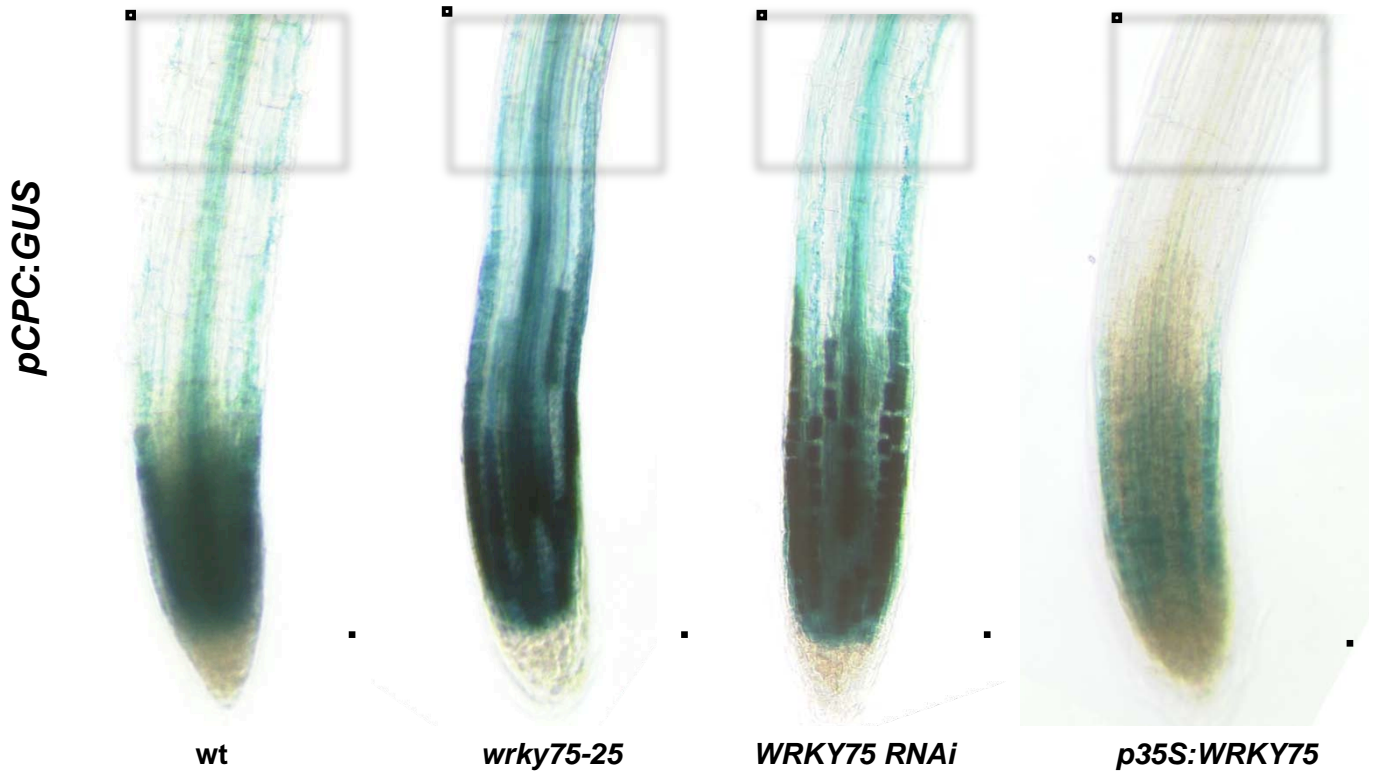

**Fig. supp.4:** Expression analysis of CPC in the stele. Expression of CPC is monitored in pCPC:GUS transgenic plants as indicated. Squares mark the analyzed region. Seedlings were stained for 8 hours. Scale bar= 50  $\mu$ m.

Fig. S5

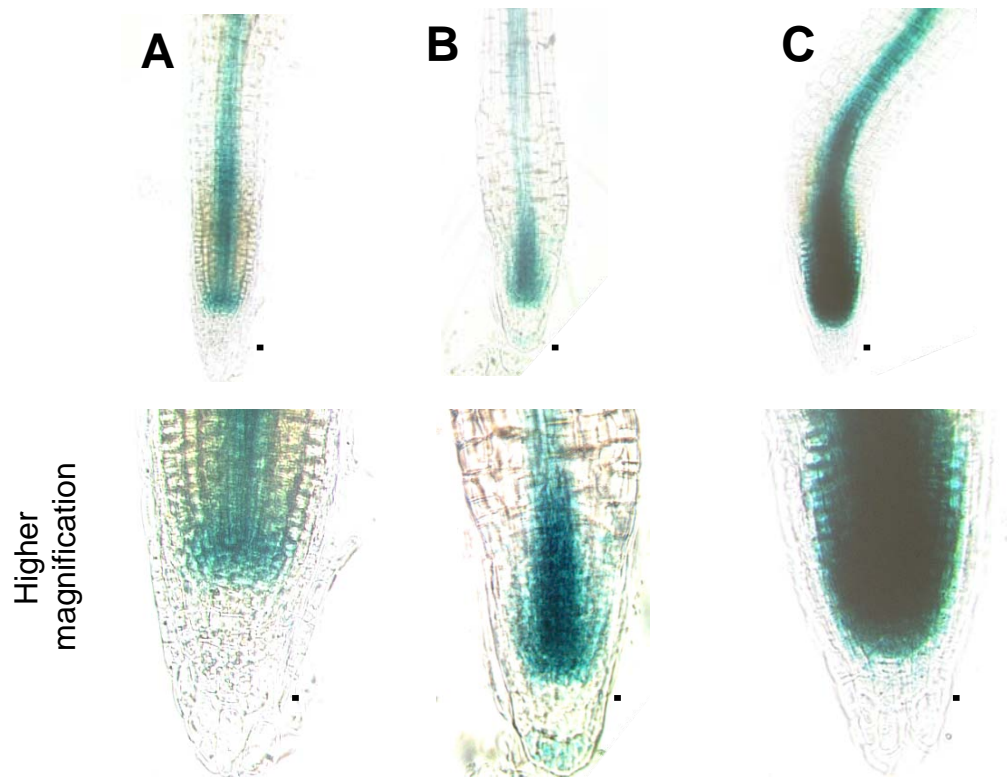

**Figure S5: Time series for *pWRKY75:GUS:3'WRKY75* GUS staining.** The seedlings were GUS-stained for 9, 12 and 24 hours labeled as (A), (B) and (C) respectively. Scale bar= 50  $\mu$ m

Fig. S6

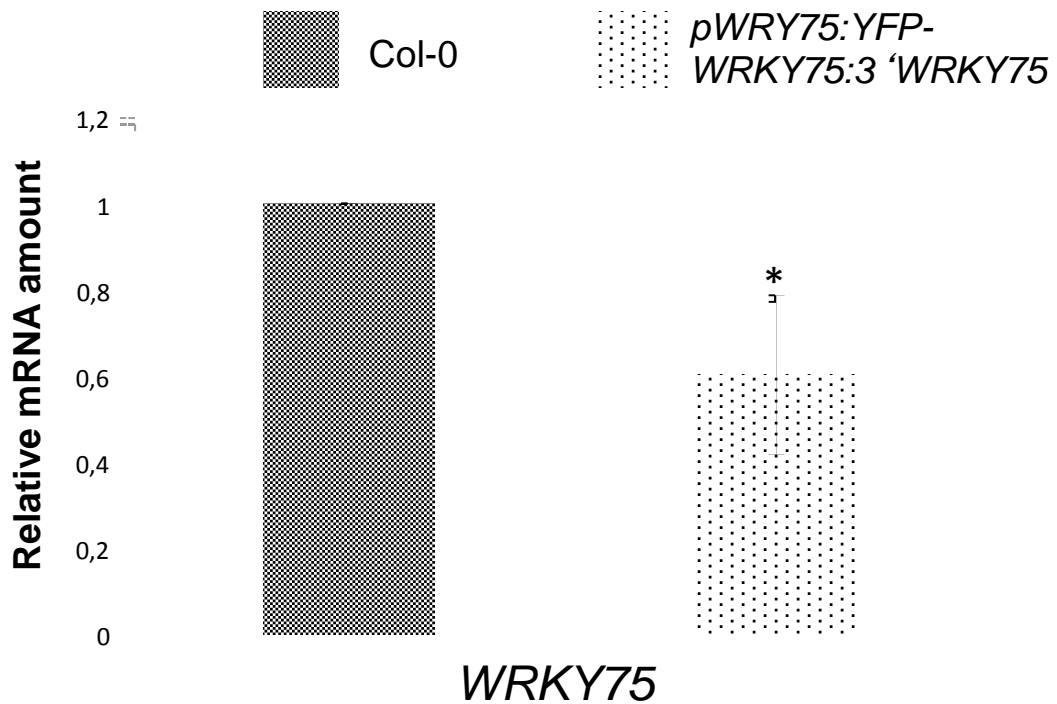

**Figure S6: qRT-PCR of mRNA obtained from root hair-patterning zone of 7-day old seedlings grown on MS media** The expression levels of genes of wt plants was set to one and subsequently used to calculate the relative changes of *WRKY75* expression of *pWRKY75:YFP-WRKY75:3'WRKY75* plants. Error bars indicate the standard deviation of three different biological replicates. \* indicates statistical significance: P value <0.005 (T-test).

Fig. S7

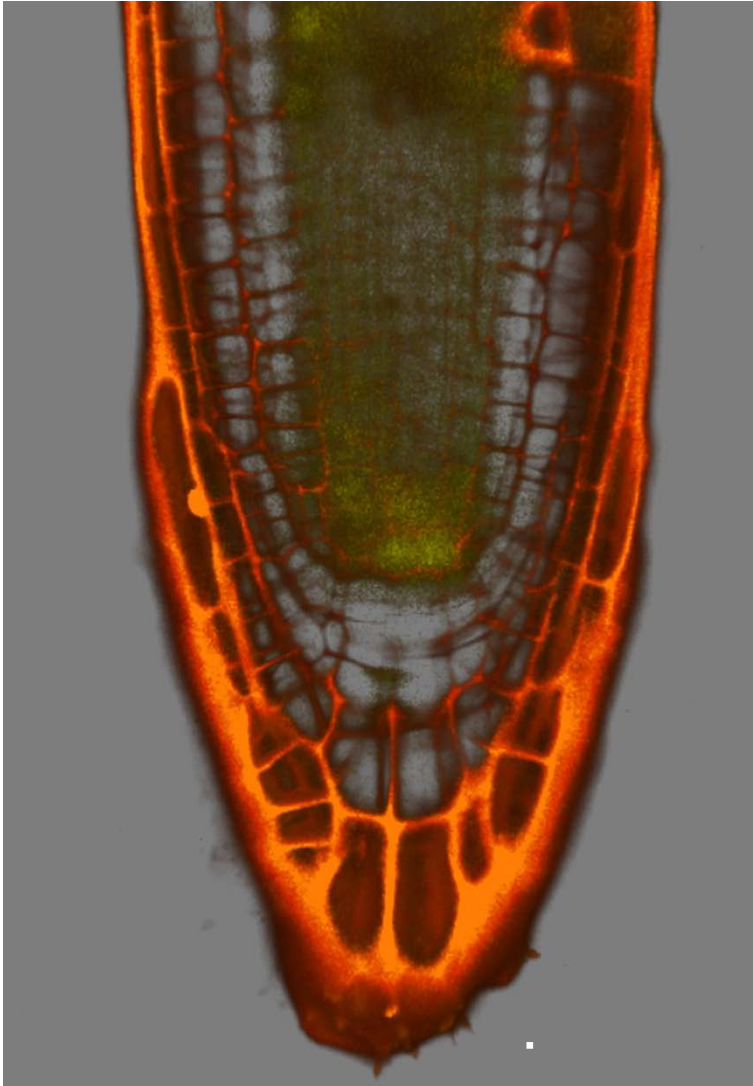

**Fig. S7: 3D reconstruction of *pWRKY75:YFP-GUS:3'WRKY75*.** YFP signal shows that *WRKY75* is expressed in the stele and vascular tissue of the primary root. Scale bar= 40  $\mu$ m.

Fig. S8

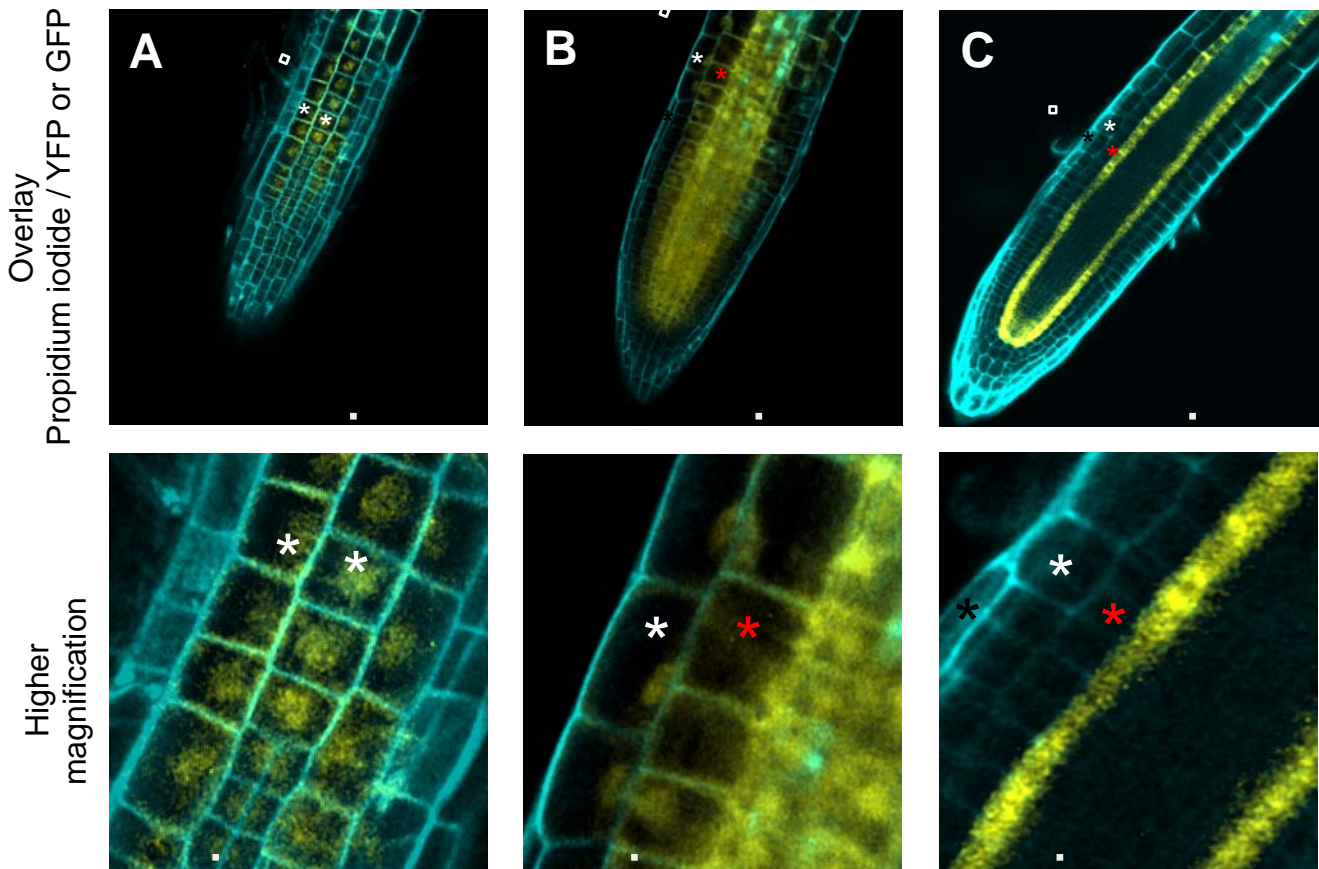

**Fig. S8: Movement of WRKY75 when expressed under the SCR promoter.** A) Epidermal section of *pSCR:YFP-WRKY75* B) Median section of *pSCR:YFP-WRKY75* . C) Median section of *pSCR:GFP*. Squares mark the region shown at a higher magnification in the figure below. Black stars point at lateral root cap cells, white stars point at epidermal cells, red stars point at cortical cells. Scale bar=50  $\mu$ m.
